# Supplementary material for: High metabolic zinc demand within native Amundsen and Ross Sea phytoplankton communities determined by stable isotope uptake rate measurements
Source: Copernicus journal article supplement (doi:10.5194/egusphere-2024-2085), 2024-08-02
Supplement: Supplementary file 1 [file egusphere-2024-2085-supplement.pdf]

## Supplementary Figures

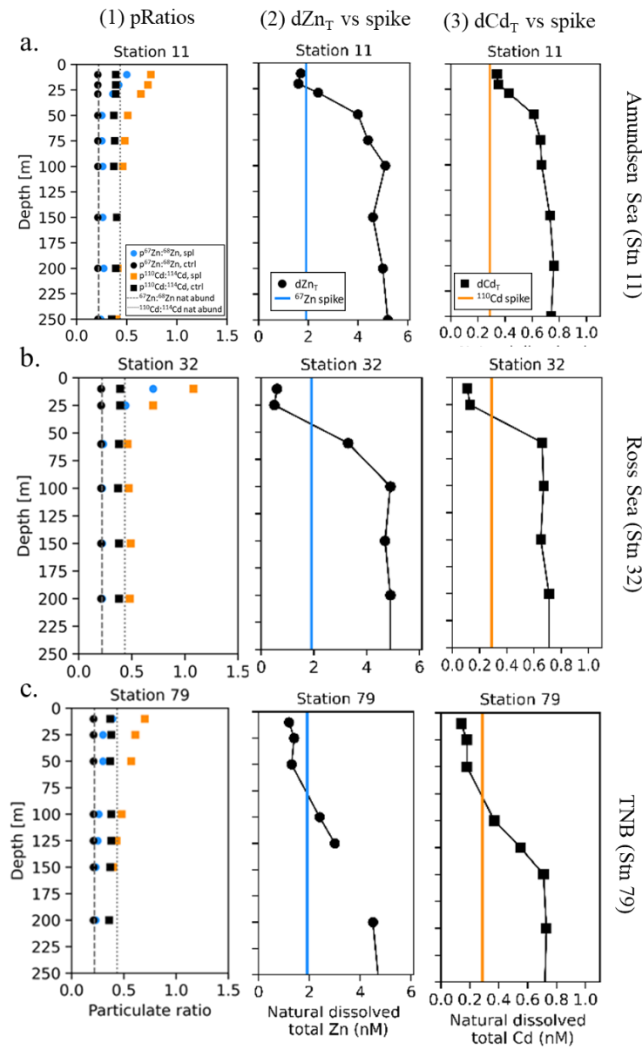

**Figure S1.** (1) Particulate  $^{67}\text{Zn}:$  $^{68}\text{Zn}$  and  $^{110}\text{Cd}:$  $^{114}\text{Cd}$  ratios measured in the  $\geq 3 \mu\text{m}$  fraction showing deviations from natural abundance ratios, (2) natural total dissolved Zn (dZn<sub>T</sub>) compared to the concentration of  $^{67}\text{Zn}$  spike added, and (3) natural total dissolved Cd (dCd<sub>T</sub>) compared to the concentration of  $^{110}\text{Cd}$  spike at a representative station from each group (a., Amundsen Sea, b. Ross Sea, c., Terra Nova Bay (TNB)). Deviation of surface sample ratios from natural abundance represents enrichment of the spiked tracer isotopes  $^{67}\text{Zn}$  and  $^{110}\text{Cd}$  in the particulate fraction, indicative of uptake from the dissolved fraction. Stn, station.

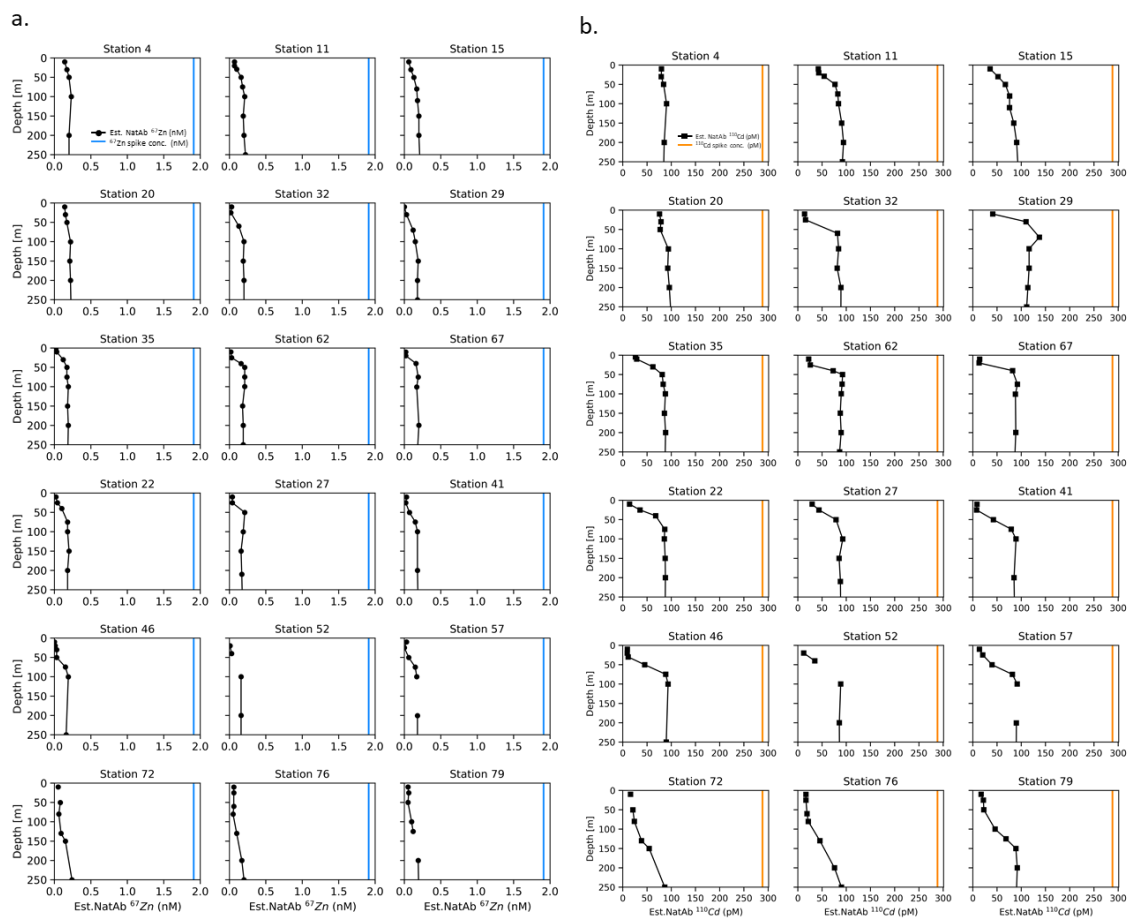

**Figure S2.** (a) The estimated natural abundance of  $^{67}\text{Zn}$  and (b) the estimated natural abundance of  $^{110}\text{Cd}$  in the upper 250m at each station calculated by multiplying total dissolved concentrations of Zn and Cd at each depth by the natural abundance of  $^{67}\text{Zn}$  and  $^{110}\text{Cd}$  (0.0410 and 0.1249, respectively; see Methods). Colored vertical lines denote the spiked concentration of  $^{67}\text{Zn}$  (blue, 1.9 nM) and  $^{110}\text{Cd}$  (orange, 288 pM). At each station, spikes were greater than the natural dissolved  $^{67}\text{Zn}$  and  $^{110}\text{Cd}$  at every depth.

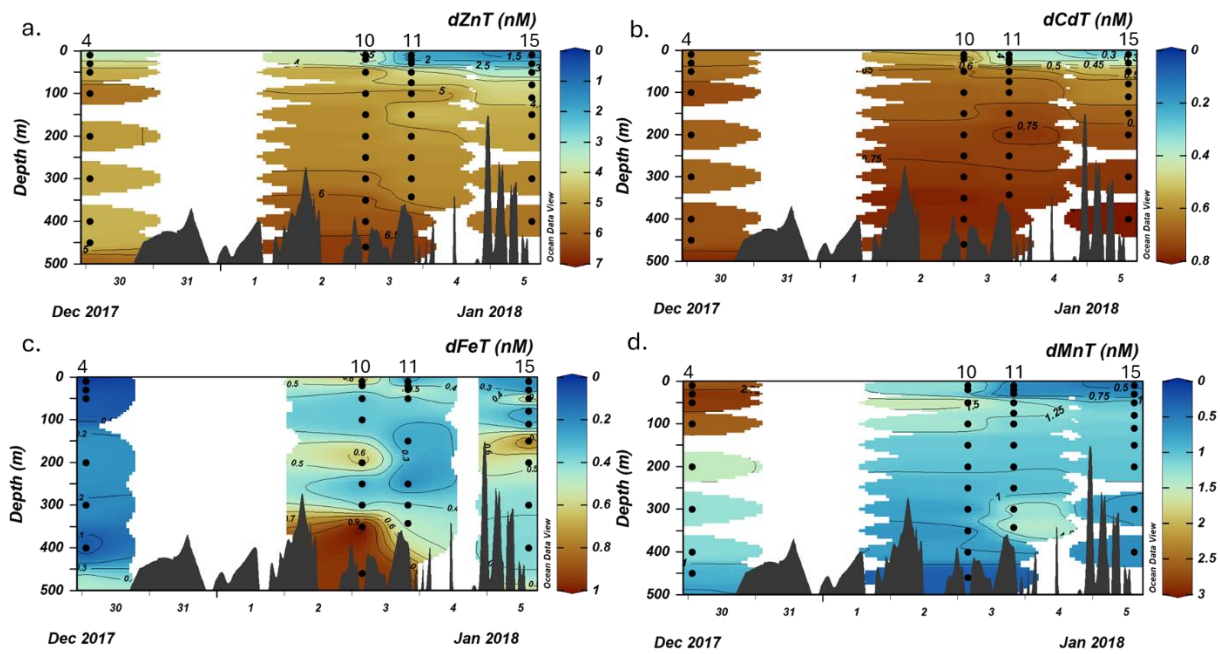

**Figure S3.** Total dissolved metal concentrations of (a) zinc, (b) cadmium, (c) iron, and (d) manganese measured in the upper 500 m in the Amundsen Sea represented in color scale.

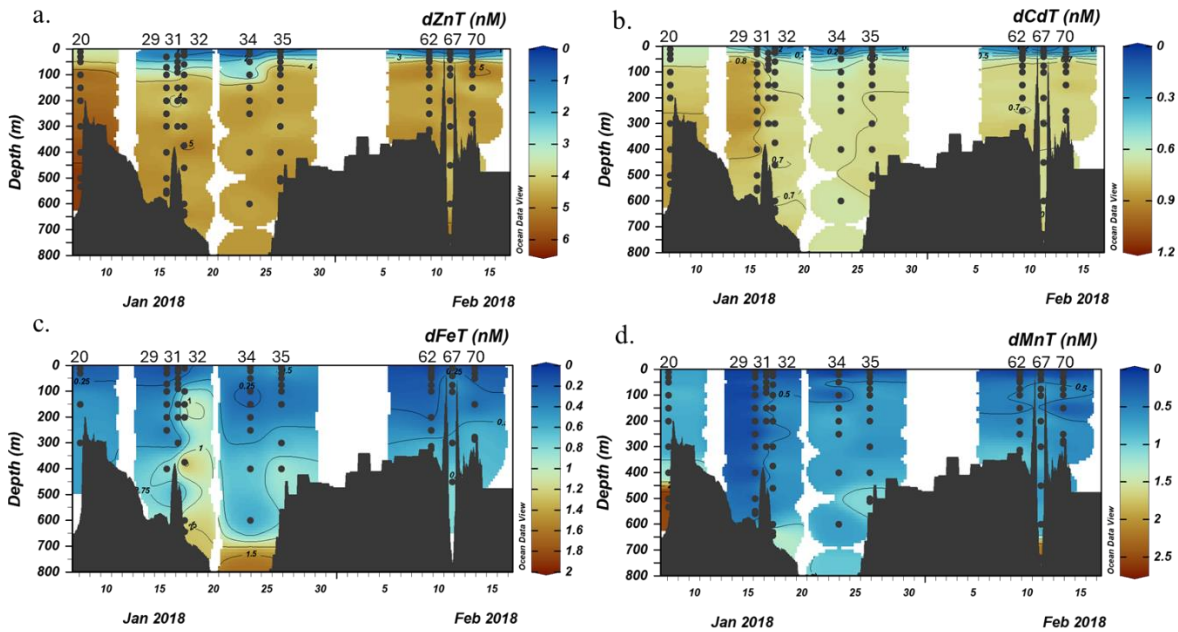

**Figure S4.** Total dissolved metal concentrations of (a) zinc, (b) cadmium, (c) iron, and (d) manganese measured in the upper 800 m in the Ross Sea represented in color scale. Data is plotted over time.

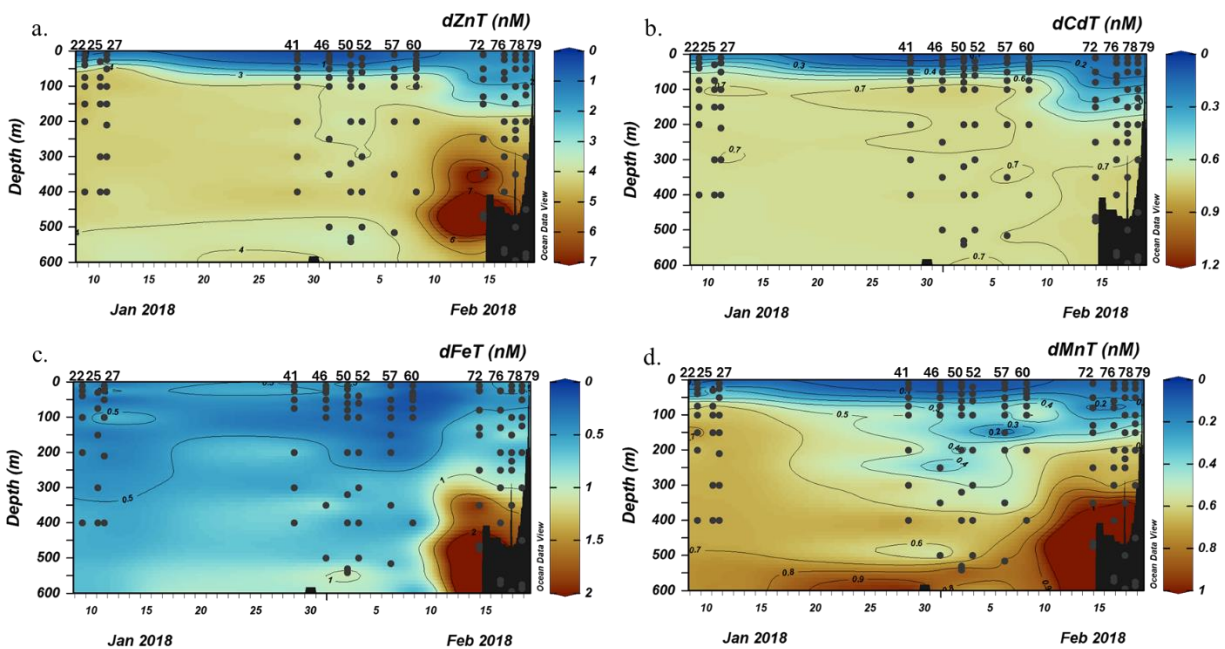

**Figure S5.** Total dissolved metal concentrations of (a) zinc, (b) cadmium, (c) iron, and (d) manganese measured in the upper 600 m in Terra Nova Bay represented in color scale. Note that samples collected at >500 m exist for stations 76, 78 and 79 but are obscured, demonstrating the limitations of gridded bathymetry file ETOPO\_2min in representing bathymetry accurately at these coastal stations.

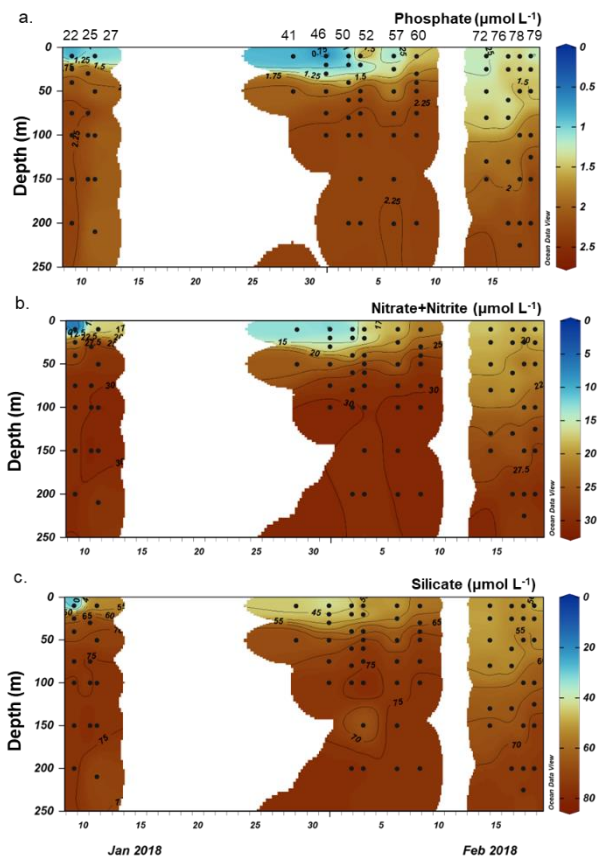

**Fig. S6. Macronutrients measured within Terra Nova Bay.** (a) phosphate, (b), sum of nitrate and nitrite, and (c) silicate in the upper 250m measured at all 13 Terra Nova Bay stations represented in color scale. Station numbers are given at the top of (a) and (I). Station data is presented in order of sampling date, from the earliest (station 22, early January) to the latest (station 79, late February).

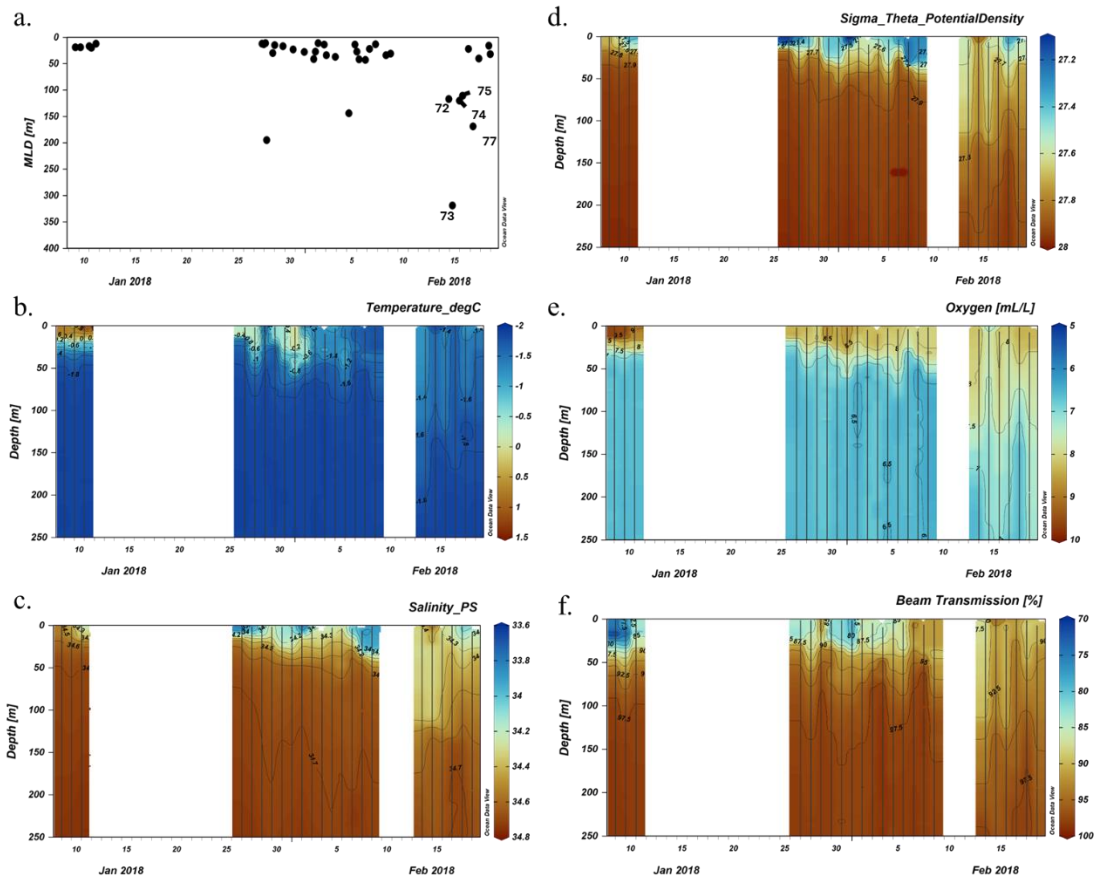

**Figure S7. Evidence for deeper water column mixing at late Terra Nova Bay stations.** (a) Mixed layer depths (MLDs) measured at Terra Nova Bay (TNB) stations. A group of late stations (station 72, 73, 74, 75, and 77) had MLDs < 100 m. The depth of the mixed layer was determined as the first depth at which the difference between the potential density ( $\sigma_\theta$ ) and reference density ( $\sigma_{ref}$ , the potential density at 10m) was greater than or equal to  $0.125 \text{ kg m}^{-3}$  (see Methods). (b) Temperature, (c) salinity, (d) potential density ( $\sigma_\theta$ ), (e) oxygen, and (f) beam transmission measured at TNB stations within the upper 250m in color scale.

## Supplementary Tables

**Table S1.** Station metadata for the CICLOPS cruise.

| Station | Latitude (°N) | Longitude (°E) | Sampling Date<br>(yyyy-mm-dd hh:mm) |
|---------|---------------|----------------|-------------------------------------|
| 4       | -72.751       | -116.001       | 2017-12-30 01:23                    |
| 10      | -73.054       | -129.988       | 2018-01-03 03:39                    |
| 11      | -74.047       | -133.764       | 2018-01-03 19:58                    |
| 15      | -75.864       | -151.918       | 2018-01-05 14:51                    |
| 20      | -76.714       | 179.819        | 2018-01-08 02:00                    |
| 22      | -75.013       | 165.358        | 2018-01-09 15:56                    |
| 25      | -75.293       | 163.914        | 2018-01-11 01:26                    |
| 27      | -74.987       | 165.890        | 2018-01-11 16:05                    |
| 29      | -76.001       | 172.997        | 2018-01-16 03:00                    |
| 31      | -77.295       | 175.390        | 2018-01-17 04:39                    |
| 32      | -76.750       | 172.000        | 2018-01-17 19:19                    |
| 34      | -77.147       | 168.503        | 2018-01-23 22:59                    |
| 35      | -76.231       | 168.769        | 2018-01-26 20:17                    |
| 41      | -74.833       | 165.002        | 2018-01-29 00:41                    |
| 46      | -74.742       | 165.287        | 2018-01-31 21:32                    |
| 50      | -74.741       | 165.488        | 2018-02-02 21:17                    |
| 52      | -75.000       | 164.005        | 2018-02-03 21:43                    |
| 57      | -74.879       | 164.482        | 2018-02-06 20:12                    |
| 60      | -74.959       | 164.739        | 2018-02-08 20:06                    |
| 62      | -74.999       | 169.491        | 2018-02-09 19:27                    |
| 67      | -76.454       | 167.919        | 2018-02-11 19:19                    |
| 70      | -74.744       | 170.374        | 2018-02-13 21:25                    |
| 72      | -74.800       | 164.395        | 2018-02-14 22:28                    |
| 76      | -74.799       | 164.597        | 2018-02-16 20:15                    |
| 78      | -74.696       | 164.796        | 2018-02-17 20:34                    |
| 79      | -74.757       | 164.356        | 2018-02-18 19:29                    |

**Table S2.** Natural abundances of Cd and Zn stable isotopes and ratios measured in this study based on IUPAC values. When added to filled incubation bottles, the added concentrations were 288 pM  $^{110}\text{Cd}$ , 4.51 pM  $^{111}\text{Cd}$ , and 1.69 pM  $^{114}\text{Cd}$  for Cd spiked bottles and 1.91 nM  $^{67}\text{Zn}$ , 0.045 nM  $^{66}\text{Zn}$ , and 0.047 nM  $^{68}\text{Zn}$  for Zn spiked bottles.

| Isotope           | Natural abundance (atom %) | Isotope ratio                     | Natural ratio | Spike ratio |
|-------------------|----------------------------|-----------------------------------|---------------|-------------|
| $^{106}\text{Cd}$ | 1.25                       | $^{114}\text{Cd}/^{110}\text{Cd}$ | 2.30          | 0.01        |
| $^{108}\text{Cd}$ | 0.89                       |                                   |               |             |
| $^{110}\text{Cd}$ | 12.49                      | $^{114}\text{Cd}/^{111}\text{Cd}$ | 2.24          | 0.37        |
| $^{111}\text{Cd}$ | 12.80                      |                                   |               |             |
| $^{112}\text{Cd}$ | 24.13                      | $^{111}\text{Cd}/^{110}\text{Cd}$ | 1.02          | 0.02        |
| $^{113}\text{Cd}$ | 12.22                      |                                   |               |             |
| $^{114}\text{Cd}$ | 28.73                      |                                   |               |             |
| $^{116}\text{Cd}$ | 7.49                       |                                   |               |             |
| $^{64}\text{Zn}$  | 48.63                      | $^{68}\text{Zn}/^{66}\text{Zn}$   | 0.67          | 1.05        |
| $^{66}\text{Zn}$  | 27.90                      | $^{68}\text{Zn}/^{67}\text{Zn}$   | 4.57          | 0.02        |
| $^{67}\text{Zn}$  | 4.10                       | $^{67}\text{Zn}/^{66}\text{Zn}$   | 0.15          | 42.71       |
| $^{68}\text{Zn}$  | 18.75                      |                                   |               |             |
| $^{70}\text{Zn}$  | 0.62                       |                                   |               |             |

**Table S3.** Reference seawater comparisons using the 2009 GEOTRACES coastal surface seawater (GSC) standard (<https://www.geotraces.org/standards-and-reference-materials/>)  $\pm$  the standard deviation of technical replicates.

| Metal | This study<br>(n = 8)<br>(nM) | GEOTRACES<br>GSC consensus<br>(nM) |
|-------|-------------------------------|------------------------------------|
| Fe    | 1.58 $\pm$ 0.23               | 1.54 $\pm$ 0.12 (n=13)             |
| Zn    | 1.39 $\pm$ 0.23               | 1.43 $\pm$ 0.10 (n=12)             |
| Cd    | 0.36 $\pm$ 0.01               | 0.36 $\pm$ 0.02 (n=9)              |
| Cu    | 1.30 $\pm$ 0.05               | 1.01 $\pm$ 0.15 (n=11)             |
| Ni    | 4.21 $\pm$ 0.07               | 4.39 $\pm$ 0.21 (n=7)              |
| Mn    | 2.06 $\pm$ 0.37               | 2.18 $\pm$ 0.08 (n=8)              |



**Table S4.** dZn:Si, dZn:P, and dCd:P stoichiometric regressions showing relationships in both the surface and deep ocean of the Amundsen Sea, Ross Sea and Terra Nova Bay, as shown in Fig. 13. Although linear regression slopes with a  $R^2 < 0.50$  should not be considered meaningful stoichiometric values, values are presented to demonstrate the range of slopes observed among station groups. Ross Sea and Terra Nova Bay dZn:P and dCd:dP data is reproduced from Chmiel et al. 2023 (Table 3) for ease of comparison with dZn:dSi data.

| Region                | dZn:dSi (mmol:mol) |     |               |                | dZn:dPO <sub>4</sub> <sup>3-</sup> (mmol:mol) |    |           |                | dCd:dPO <sub>4</sub> <sup>3-</sup> (mmol:mol) |     |             |                |
|-----------------------|--------------------|-----|---------------|----------------|-----------------------------------------------|----|-----------|----------------|-----------------------------------------------|-----|-------------|----------------|
|                       | Depths (m)         | n   | Slope         | R <sup>2</sup> | Depths (m)                                    | n  | Slope     | R <sup>2</sup> | Depths (m)                                    | n   | Slope       | R <sup>2</sup> |
| <b>Amundsen Sea</b>   |                    |     |               |                |                                               |    |           |                |                                               |     |             |                |
| Surface               | 0-30               | 9   | 0.23 ± 0.05   | 0.72           | 0-30                                          | 9  | 4.6 ± 0.9 | 0.72           | 0-25                                          | 6   | 0.47 ± 0.08 | 0.86           |
| Deep                  | > 30               | 35  | 0.08 ± 0.01   | 0.70           | > 30                                          | 35 | 11 ± 2.5  | 0.37           | > 25                                          | 38  | 0.59 ± 0.06 | 0.72           |
| <b>Ross Sea</b>       |                    |     |               |                |                                               |    |           |                |                                               |     |             |                |
| Surface               | 0-30               | 12  | 0.004 ± 0.006 | 0.04           | 0-30                                          | 11 | 0.18      | 0.07           | 0-25                                          | 11  | 0.19 ± 0.05 | 0.56           |
| Deep                  | > 30               | 77  | 0.15 ± 0.02   | 0.35           | > 30                                          | 77 | 9.8 ± 1.0 | 0.54           | > 25                                          | 79  | 0.69 ± 0.13 | 0.26           |
| <b>Terra Nova Bay</b> |                    |     |               |                |                                               |    |           |                |                                               |     |             |                |
| Surface               | 0-30               | 18  | 0.03 ± 0.01   | 0.30           | 0-50                                          | 24 | 1.9 ± 0.3 | 0.65           | 0-30                                          | 21  | 0.15 ± 0.03 | 0.59           |
| Deep                  | > 30               | 102 | 0.15 ± 0.02   | 0.35           | > 50                                          | 95 | 13 ± 2.0  | 0.30           | > 30                                          | 104 | 0.64 ± 0.03 | 0.80           |

**Table S5.** The % of total Chl allocated by the major phytoplankton taxonomic groups in the Amundsen Sea. The values represent the average in the upper 50m of the water column as estimated using the CHEMTAX matrix factorization program that uses diagnostic xanthophyll pigment concentrations with initial pigment ratios specific to Antarctic coastal waters (DiTullio et al., 2003).

| Station No. | % Diatom | % Phaeocystis | % Prasinophytes | % Dinoflagellates | % Cryptophytes |
|-------------|----------|---------------|-----------------|-------------------|----------------|
| 5           | 80.4     | 6.23          | 9.21            | 1.84              | 1.59           |
| 10          | 20.1     | 66.2          | 7.30            | 3.96              | 0.24           |
| 11          | 10.2     | 82.6          | 4.01            | 2.98              | 0.24           |
| 15          | 1.82     | 94.9          | 2.92            | 0.5               | 0.13           |
| 20          | 1.44     | 63.3          | 4.08            | 15.3              | 18.0           |
| 22          | 7.55     | 88.3          | 2.27            | 0.68              | 0.42           |
| 27          | 5.64     | 88.7          | 1.76            | 3.53              | 0.24           |
| 29          | 31.3     | 54.2          | 2.14            | 7.21              | 2.81           |
| 32          | 18.9     | 70.3          | 3.24            | 5.09              | 1.10           |
| 41          | 25.6     | 59.3          | 3.99            | 6.57              | 1.77           |
| 46          | 24.4     | 55.62         | 4.31            | 11.9              | 1.22           |
| 52          | 32.4     | 52.0          | 4.26            | 6.02              | 2.19           |
| 57          | 33.2     | 48.3          | 6.88            | 7.71              | 2.30           |
| 72          | 35.32    | 43.88         | 6.07            | 8.65              | 2.71           |
| 79          | 42.58    | 36.55         | 4.42            | 9.70              | 2.96           |
